# Supplementary material for: High dose multiple micronutrient supplementation improves villous morphology in environmental enteropathy without HIV enteropathy: results from a double-blind randomised placebo controlled trial in Zambian adults
Source: PubMed Central journal article supplement (PMC3897937; doi:10.1186/1471-230x-14-15), 2014-01-15
Supplement: 1471-230X-14-15-S3.pdf [file 1471-230X-14-15-S3.pdf]

**Additional file 3. Adverse events. (PDF file)**

|                         | HIV positive |    |                       | HIV negative |    |                       | Overall               |
|-------------------------|--------------|----|-----------------------|--------------|----|-----------------------|-----------------------|
|                         | Placebo      | MM | <i>P</i> <sup>a</sup> | Placebo      | MM | <i>P</i> <sup>a</sup> | <i>P</i> <sup>a</sup> |
| Headache                | 5            | 1  | 0.29                  | 2            | 2  | 1                     | 0.28                  |
| Neck ache               | 1            | 0  | 1                     | 0            | 0  | 1                     | 1                     |
| Syphilis                | 0            | 0  | 1                     | 0            | 1  | 1                     | 1                     |
| Generalised weakness    | 0            | 1  | 0.4                   | 0            | 0  | 1                     | 1                     |
| Sore eyes               | 0            | 1  | 0.4                   | 1            | 0  | 0.48                  | 1                     |
| Abdominal pain          | 2            | 1  | 1                     | 0            | 0  | 1                     | 0.23                  |
| Cough                   | 3            | 4  | 0.32                  | 4            | 0  | <b>0.04</b>           | 1                     |
| Fever                   | 3            | 1  | 0.6                   | 0            | 1  | 1                     | 1                     |
| Toothache               | 2            | 0  | 0.49                  | 2            | 1  | 0.59                  | 1                     |
| Joint pains             | 2            | 0  | 0.49                  | 1            | 0  | 0.48                  | 1                     |
| Mild watery diarrhoea   | 2            | 0  | 0.49                  | 0            | 0  | 1                     | 0.49                  |
| Severe watery diarrhoea | 3            | 3  | 0.62                  | 1            | 1  | 1                     | 1                     |
| Pellagra / sore mouth   | 0            | 1  | 0.4                   | 0            | 0  | 1                     | 0.49                  |
| Limb pains              | 0            | 0  | 1                     | 0            | 2  | 0.48                  | 1                     |
| Presumed malaria        | 2            | 1  | 1                     | 0            | 1  | 1                     | 1                     |
| TOTAL                   | 25           | 14 |                       | 11           | 9  |                       |                       |

<sup>a</sup>*P* values given for Fisher's exact test. <sup>b</sup> Severe diarrhoea defined as diarrhoea resulting in time off work or usual activities, use of antibiotics, use of oral rehydration solution, or healthcare assessment (there were no hospitalisations). MM, multiple micronutrient supplementation.
