# Supplementary material for: High dose multiple micronutrient supplementation improves villous morphology in environmental enteropathy without HIV enteropathy: results from a double-blind randomised placebo controlled trial in Zambian adults
Source: PubMed Central journal article supplement (PMC3897937; doi:10.1186/1471-230x-14-15), 2014-01-15
Supplement: 1471-230X-14-15-S4.pdf [file 1471-230X-14-15-S4.pdf]

**Additional file 4. Comparison of morphometric studies of EE and / or HIV enteropathy in  
Zambian adults. (PDF file)**

| Patient group | Parameter | Kelly[6]     | Kelly[6]     | Current study  |
|---------------|-----------|--------------|--------------|----------------|
|               |           | CD4 >200     | CD4 <200     | CD4 159-656    |
| <b>EE+HIV</b> | VH        | 255 (47)     | 247 (39)     | 269 (40)       |
|               | CD        | 173 (26)*    | 174 (33)*    | 157 (15)       |
|               | MT        | [428]        | [421]        | 425 (45)       |
|               | VW        | 209 (56)     | 217 (47)     | 163 (152-192)  |
|               | VP        | 425 (101)    | 415 (74)     | 391 (353-414)* |
|               | VA        | 16733 (4074) | 18195 (7055) | 31246 (5734)*  |
| <b>EE</b>     | VH        | 265 (49)     | 265 (49)     | 237 (40)       |
|               | CD        | 149 (29)*    | 149 (29)*    | 152 (22)       |
|               | MT        | [414]        | [414]        | 388 (48)       |
|               | VW        | 193 (39)     | 193 (39)     | 130 (118-171)  |
|               | VP        | 458 (112)    | 458 (112)    | 274 (244-320)* |
|               | VA        | 16659 (4082) | 16659 (4082) | 21651 (5722)*  |

\* Significant difference ( $P < 0.05$ ) between patient groups. Mucosal thickness in the Kelly study was not stated and has been calculated by adding mean VH and CD. VH, CD, VW and MT expressed in  $\mu\text{m}$  (SD; IQR for VW in current study); VA and VP expressed in  $\mu\text{m}/100\mu\text{m}$  mucosal length (SD; IQR for VA in current study). CD, crypt depth; EE, environmental enteropathy; IQR, interquartile range; MM, multiple micronutrient supplementation; MT, mucosal thickness; VA, villous area; VH, villous height; VP, villous perimeter; VW, villous width.
